# Supplementary material for: Photochemical and electrochemical reduction of graphene oxide thin films: tuning the nature of surface defects
Source: Royal Society of Chemistry journal article supplement (doi:10.1039/d0cp02053b), 2020-01-01
Supplement: d0cp02053b1.pdf [file d0cp02053b1.pdf]

## Electronic Supplementary Information

### **Photochemical and electrochemical reduction of graphene oxide thin films: tuning the nature of surface defects**

Javier A. Quezada Renteria<sup>a,b</sup>, Cristina Ruiz-García<sup>a</sup>, Thierry Sauvage<sup>a</sup>, Luis F. Chazaro-Ruiz<sup>b</sup>, Jose R. Rangel-Mendez<sup>b</sup>, Conchi O. Ania\*<sup>a</sup>

**Table S1.** Elemental Analysis (wt.%) of the pristine bulk GO. Data has been recalculated as at.% for comparison purposes.

**Table S2.** Layer Thickness and atomic concentrations of oxygen, carbon and nitrogen of the studied thin films, as extracted from NRA analyses. Film thicknesses were obtained in  $\text{at}\cdot\text{cm}^{-2}$ ; a density value of  $1.9\text{ g}\cdot\text{cm}^{-3}$  (GO without porosity) was used to convert  $\text{at}\cdot\text{cm}^{-2}$  units in metric system.

**Table S3.** Fitting parameters calculated for all samples upon deconvolution of the first and second order Raman spectra.

**Figure S1.** (left) Thermogravimetric profile of pristine GO compared to graphite powders used as precursor; (right) selected  $m/z$  signals of the gases evolved upon the thermal analysis detected by a mass-spectrometer coupled to the thermobalance.

**Figure S2.** X-ray diffraction patterns of the synthesized GO compared to the graphite used as precursor.

**Figure S3.** Temperature evolution of the electrolytic solution during the photochemical irradiation of the electrodes.

**Figure S4.** Cyclic voltammograms recorded at 2 mV/s in a neutral aqueous electrolyte for the series of thin film electrodes supported on ITO glass substrate: (A) cycles on GO electrode, to obtain ErGO; (B) cycles on PhrGO electrode, to obtain EPhrGO.

**Figure S5.** Deconvolution of the C1s core spectra of A) GO, B) ErGO, C) PhrGO, D) PhErGO and E) EPhrGO.

**Figure S6.** NRA spectra of samples GO, ErGO and EPhrGO.

**Figure S7.** Deconvolution of the O1s core spectra spectra of A) GO, B) ErGO, C) PhrGO, D) PhErGO and E) EPhrGO.

**Figure S8.** Deconvolutions of the Raman spectra (first and second order) of the studied samples.

**Table S1.** Elemental Analysis (wt.%) of the pristine bulk GO. Data has been recalculated as at.% for comparison purposes.

|                  | Carbon | Sulphur | Hydrogen | Oxygen | Nitrogen |
|------------------|--------|---------|----------|--------|----------|
| <b>GO (wt.%)</b> | 49.51  | 2.06    | 1.83     | 46.60  | 0        |
| <b>GO (at.%)</b> | 46.53  | 0.72    | 19.9     | 32.85  | 0        |

**Table S2.** Layer Thickness and atomic concentrations of oxygen, carbon and nitrogen of the studied thin films, as extracted from NRA analyses. Film thicknesses were obtained in  $\text{at}\cdot\text{cm}^{-2}$ ; a density value of  $1.9 \text{ g}\cdot\text{cm}^{-3}$  (GO without porosity) was used to convert  $\text{at}\cdot\text{cm}^{-2}$  units in metric system.

| Sample        | layer thickness ( $\times 10^{15} \text{ at}\cdot\text{cm}^{-2}$ ) | layer thickness (nm) | Carbon (at.%) | Oxygen (at.%) | Nitrogen (at.%) |
|---------------|--------------------------------------------------------------------|----------------------|---------------|---------------|-----------------|
| <b>GO</b>     | $2000 \pm 100$                                                     | $230 \pm 10$         | $62 \pm 2$    | $32 \pm 1$    | $6 \pm 2$       |
| <b>ErGO</b>   | $1650 \pm 100$                                                     | $190 \pm 10$         | $82 \pm 2$    | $18 \pm 1$    | $< 1$           |
| <b>PhrGO</b>  | $1100 \pm 100$                                                     | $130 \pm 10$         | $80 \pm 2$    | $20 \pm 2$    | $< 1$           |
| <b>EPhrGO</b> | $2500 \pm 100$                                                     | $290 \pm 10$         | $82 \pm 2$    | $18 \pm 1$    | $< 1$           |
| <b>PhErGO</b> | $800 \pm 100$                                                      | $100 \pm 10$         | $81 \pm 2$    | $19 \pm 2$    | $< 1$           |

**Table S3.** Fitting parameters calculated for all samples upon deconvolution of the first and second order Raman spectra.

|               |                            | <b>D*</b>    | <b>D</b>     | <b>D''</b>   | <b>G</b>     | <b>D'</b>    | <b>X</b>     | <b>2D</b>      | <b>G+D</b>     | <b>2D'</b>     |
|---------------|----------------------------|--------------|--------------|--------------|--------------|--------------|--------------|----------------|----------------|----------------|
|               | <b>Peak Type</b>           | <b>Gauss</b> | <b>Voigt</b> | <b>Gauss</b> | <b>Voigt</b> | <b>Voigt</b> | <b>Voigt</b> | <b>Lorentz</b> | <b>Lorentz</b> | <b>Lorentz</b> |
| <b>GO</b>     | Area (%)                   | 0.77         | 44.03        | 7.56         | 12.91        | 8.30         | 1.40         | 8.22           | 15.42          | 1.41           |
|               | Center (cm <sup>-1</sup> ) | 1110         | 1354         | 1510         | 1566         | 1610         | 1725         | 2709           | 2916           | 3190           |
|               | Max Height                 | 0.018        | 1.000        | 0.225        | 0.618        | 0.658        | 0.049        | 0.131          | 0.216          | 0.029          |
|               | FWHM (cm <sup>-1</sup> )   | 177          | 132          | 141          | 67           | 53           | 119          | 188            | 219            | 150            |
| <b>ErGO</b>   | Area (%)                   | 0.35         | 46.50        | 4.52         | 15.06        | 6.66         | 0.40         | 9.98           | 14.72          | 1.81           |
|               | Center (cm <sup>-1</sup> ) | 1149         | 1354         | 1506         | 1584         | 1610         | 1725         | 2708           | 2934           | 3179           |
|               | Max Height                 | 0.009        | 1.000        | 0.136        | 0.542        | 0.466        | 0.013        | 0.129          | 0.190          | 0.049          |
|               | FWHM (cm <sup>-1</sup> )   | 130          | 109          | 112          | 87           | 48           | 82           | 186            | 189            | 88             |
| <b>PhrGO</b>  | Area (%)                   | 0.78         | 37.07        | 4.74         | 18.03        | 6.59         | 0.099        | 8.46           | 20.74          | 3.48           |
|               | Center (cm <sup>-1</sup> ) | 1149         | 1353         | 1478         | 1583         | 1616         | 1725         | 2710           | 2936           | 3178           |
|               | Max Height                 | 0.027        | 1.000        | 0.161        | 0.769        | 0.643        | 0.016        | 0.181          | 0.309          | 0.094          |
|               | FWHM (cm <sup>-1</sup> )   | 130          | 117          | 131          | 72           | 40           | 27           | 146            | 218            | 119            |
| <b>EPhrGO</b> | Area (%)                   | 0.57         | 44.70        | 3.51         | 13.96        | 7.03         | 0.59         | 10.84          | 16.34          | 2.45           |
|               | Center (cm <sup>-1</sup> ) | 1149         | 1354         | 1504         | 1583         | 1610         | 1725         | 2702           | 2934           | 3188           |
|               | Max Height                 | 0.015        | 1.000        | 0.126        | 0.523        | 0.512        | 0.020        | 0.146          | 0.224          | 0.056          |
|               | FWHM (cm <sup>-1</sup> )   | 130          | 109          | 97           | 87           | 48           | 82           | 186            | 184            | 110            |
| <b>PhErGO</b> | Area (%)                   | 3.10         | 44.88        | 4.82         | 17.00        | 6.74         | 1.43         | 8.91           | 11.64          | 1.48           |
|               | Center (cm <sup>-1</sup> ) | 1149         | 1354         | 1500         | 1586         | 1610         | 1725         | 2705           | 2940           | 3188           |
|               | Max Height                 | 0.052        | 1.000        | 0.175        | 0.643        | 0.496        | 0.049        | 0.105          | 0.162          | 0.033          |
|               | FWHM (cm <sup>-1</sup> )   | 211          | 119          | 97           | 87           | 48           | 82           | 211            | 179            | 110            |

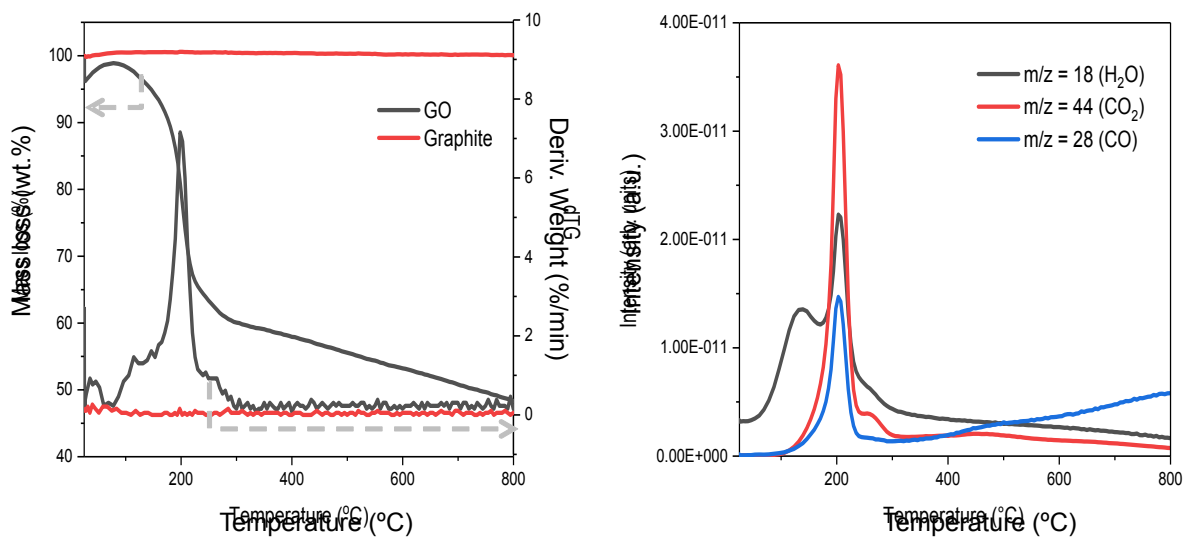

**Figure S1.** (left) Thermogravimetric profile of pristine GO compared to graphite powders used as precursor; (right) selected m/z signals of the gases evolved upon the thermal analysis detected by a mass-spectrometer coupled to the thermobalance.

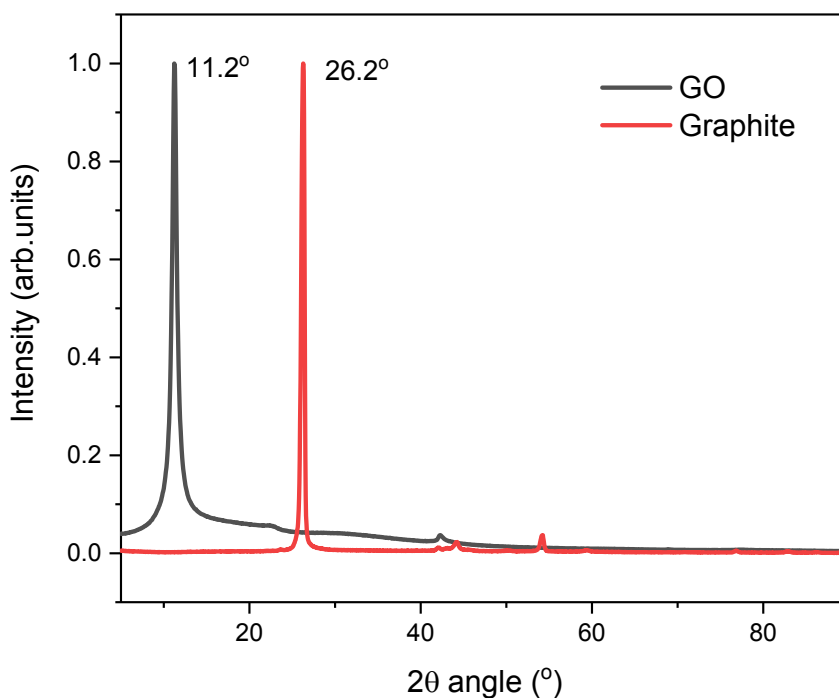

**Figure S2.** X-ray diffraction patterns of the synthesized GO compared to the graphite used as precursor.

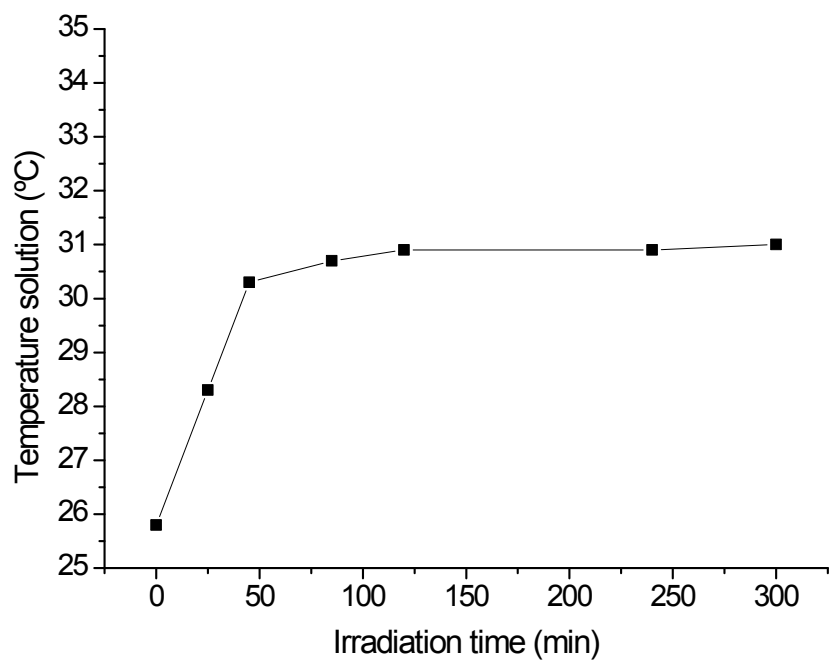

**Figure S3.** Temperature evolution of the electrolytic solution during the photochemical irradiation of the electrodes

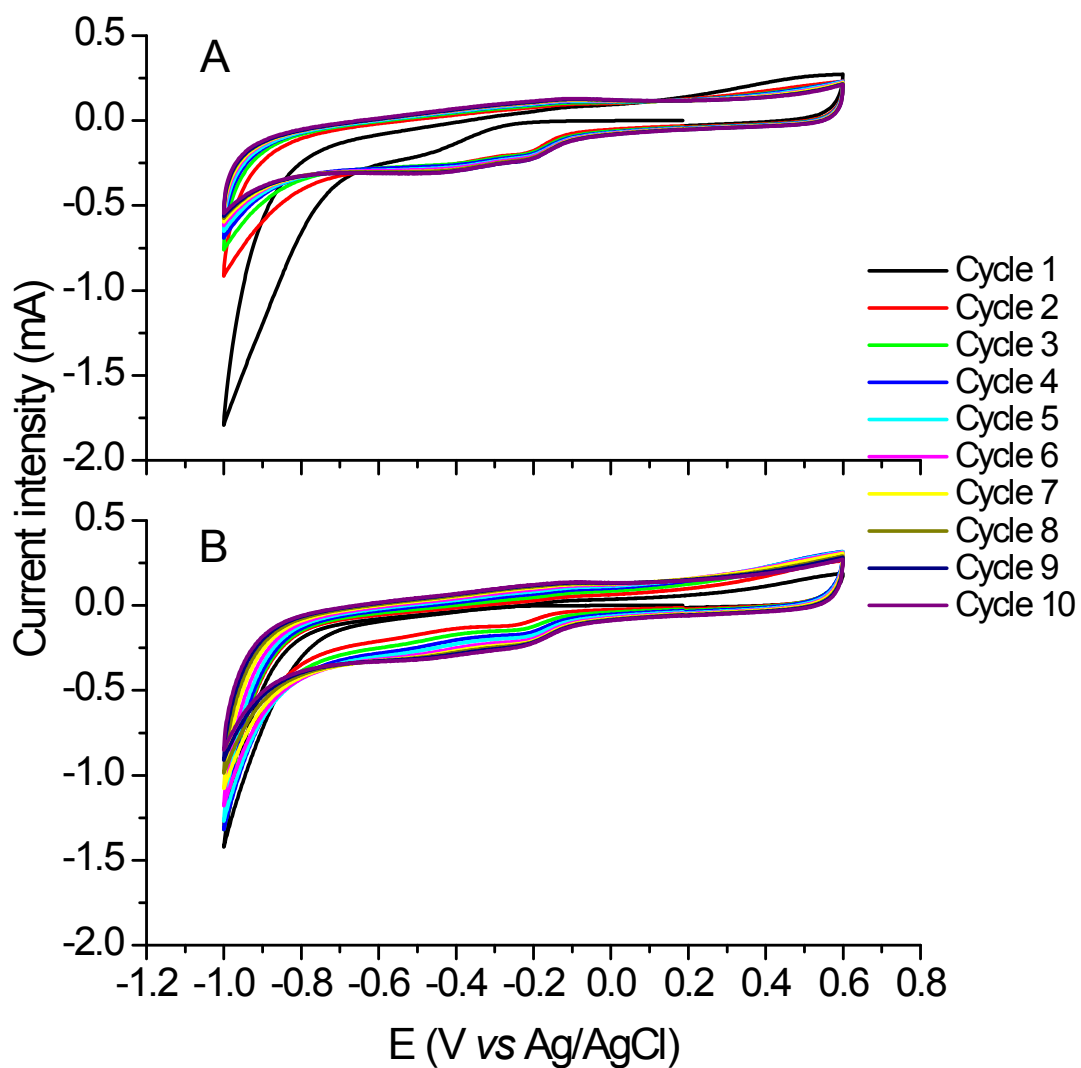

**Figure S4.** Cyclic voltammograms recorded at 2 mV/s in a neutral aqueous electrolyte for the series of thin film electrodes supported on ITO glass substrate: (A) cycles on PhrGO electrode to obtain PhErGO; (B) cycles on GO electrode, to obtain ErGO.

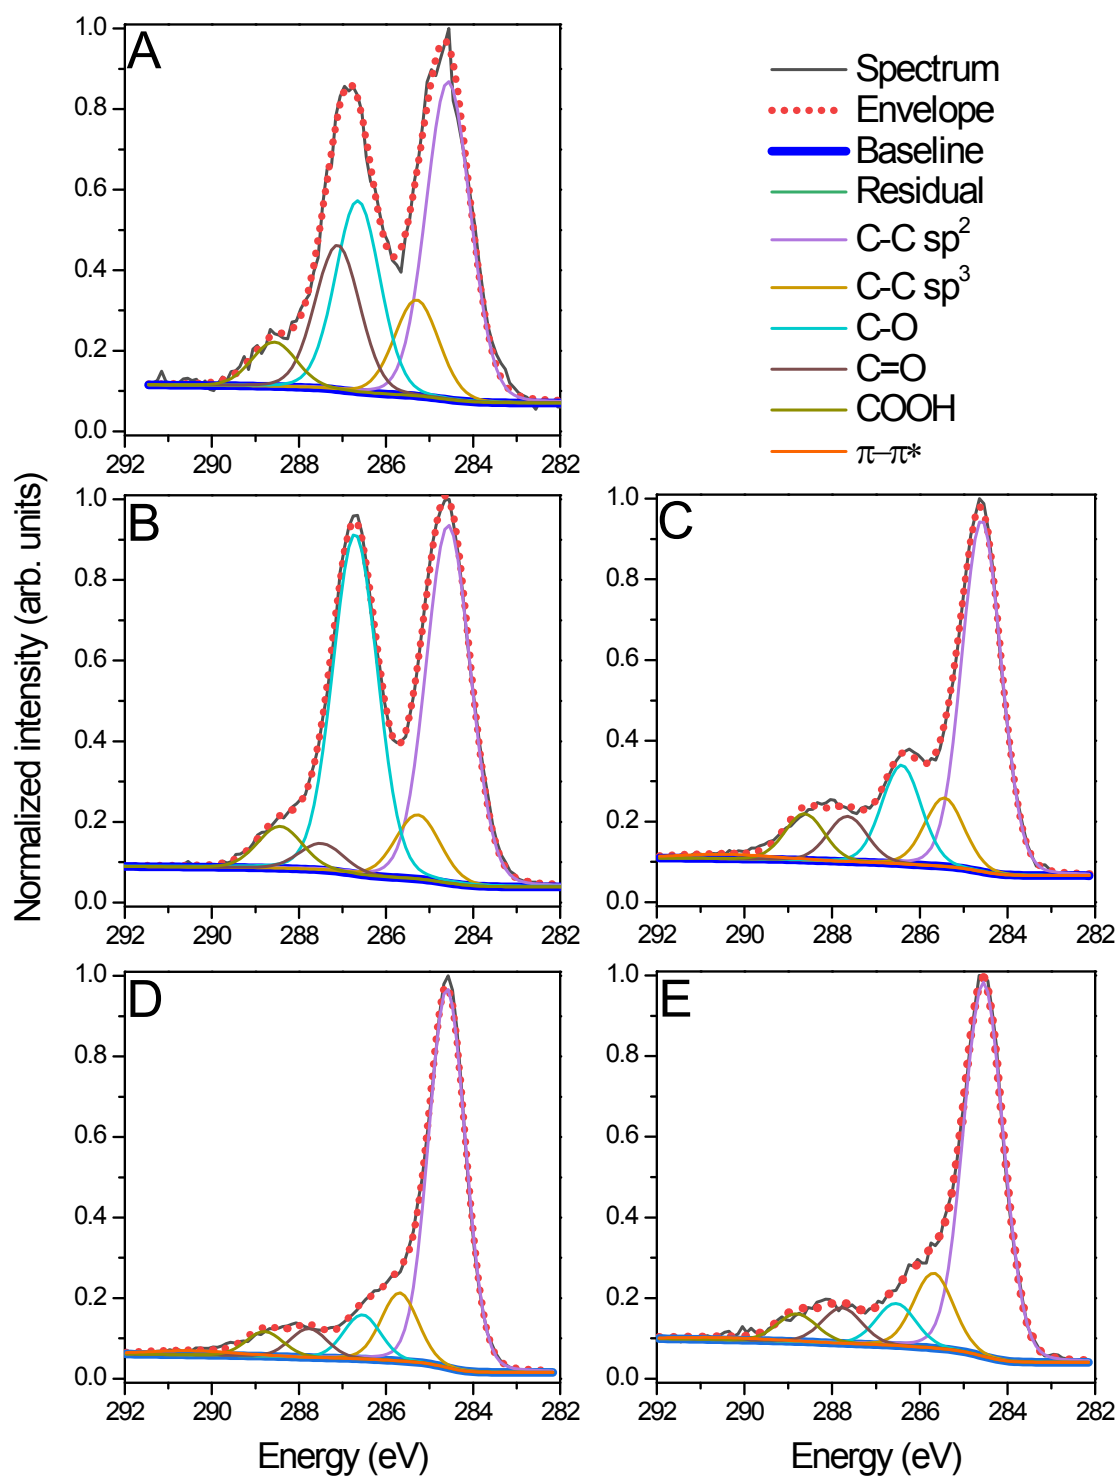

**Figure S5.** Deconvolution of the C1s core spectra of A) GO, B) ErGO, C) PhrGO, D) PhErGO and E) EPhrGO.

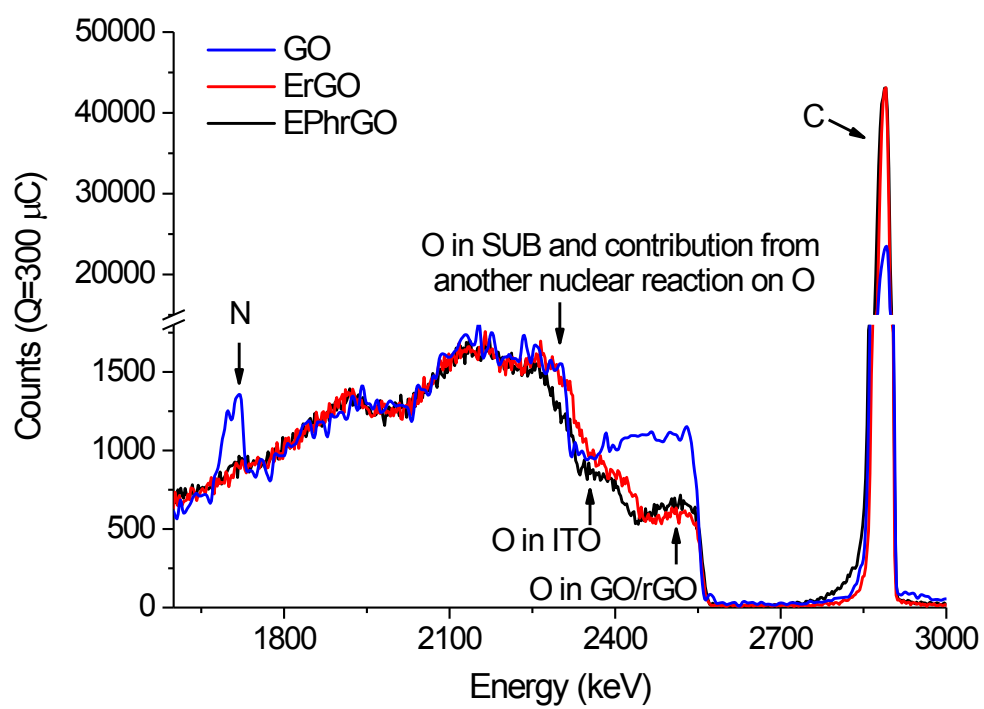

**Figure S6.** NRA spectra of samples GO, ErGO and EPhrGO.



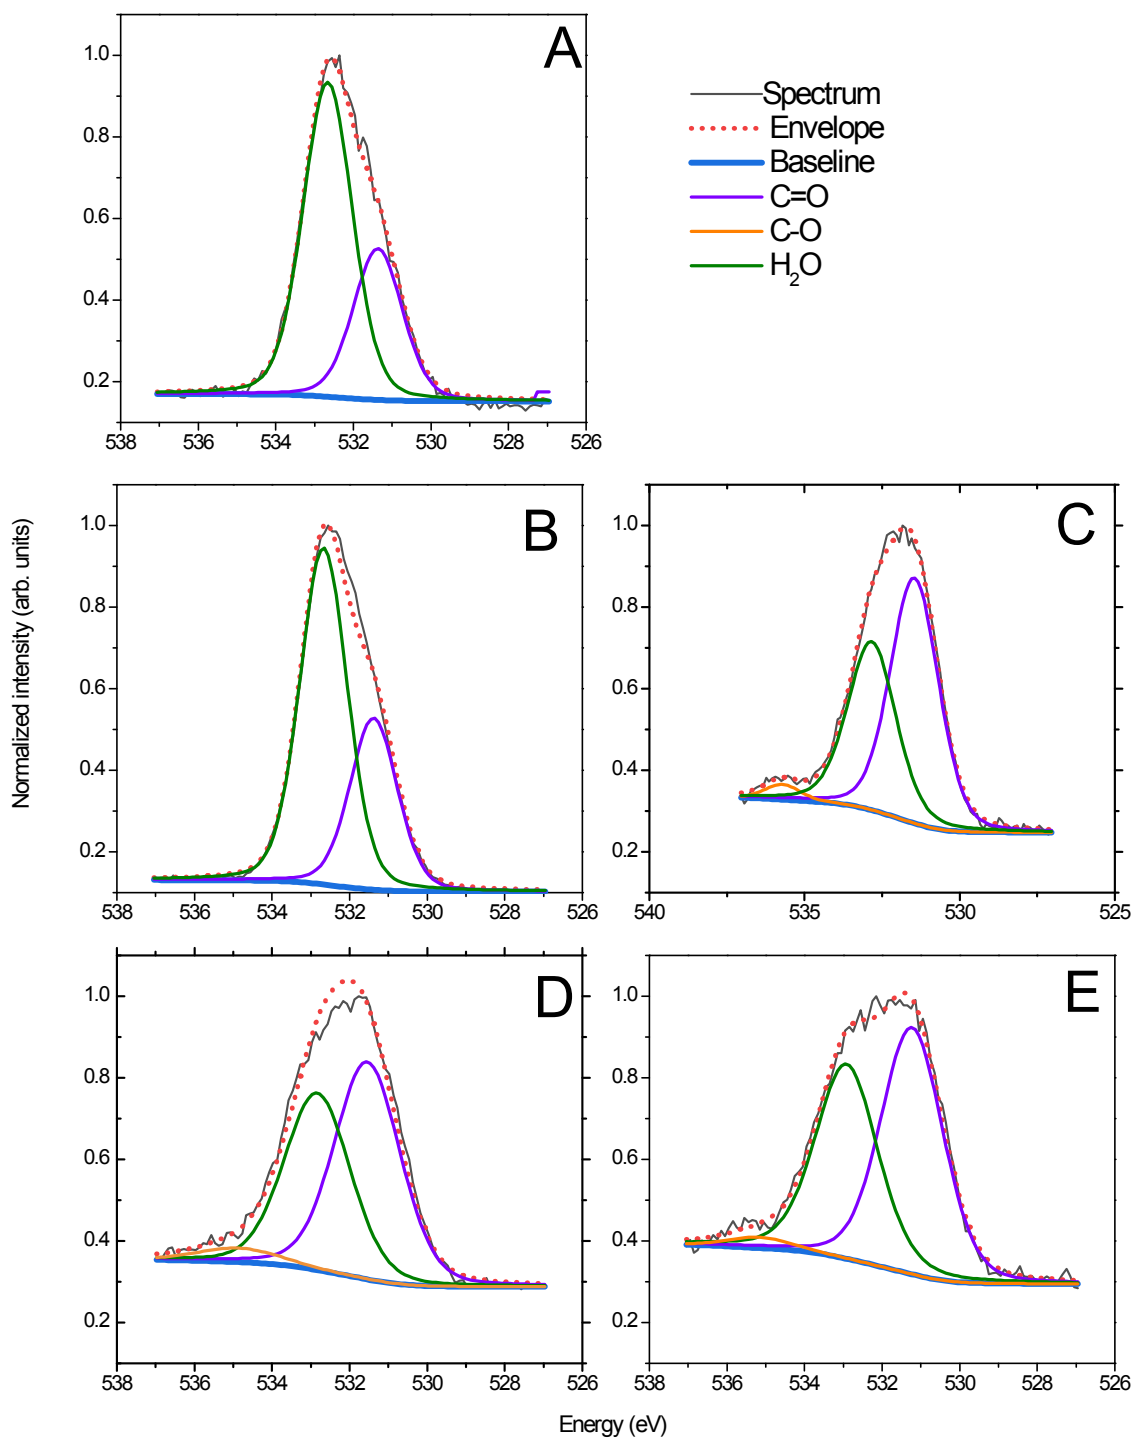

**Figure S7.** Deconvolution of the O1s core spectra of A) GO, B) ErGO, C) PhrGO, D) PhErGO and E) EPhrGO

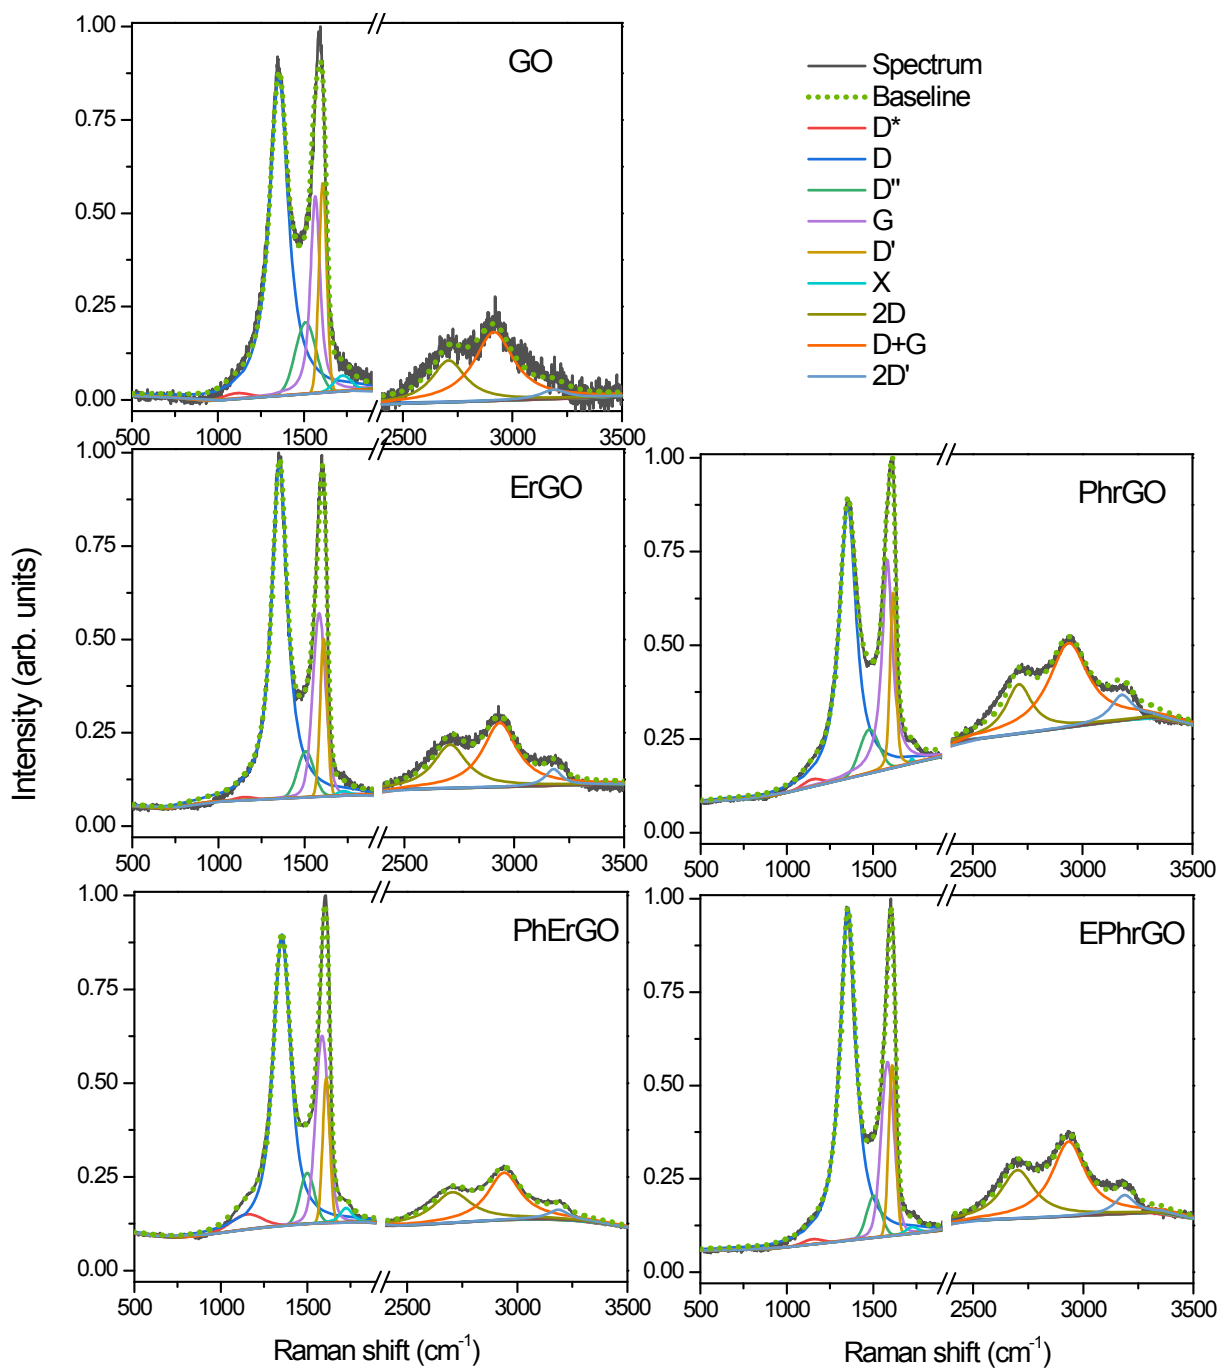

**Figure S8.** Deconvolutions of the Raman spectra (first and second order) of the studied samples.
